# Supplementary material
Source: publisher site journal article supplement (https://www.spandidos-publications.com/7653/downloadSupplementary)
Supplement: Supplementary file 1 [file downloadSupplementary]

Table SI. Primer sequences.

| Gene           | Direction | Sequence (5'-3')        |
|----------------|-----------|-------------------------|
| CHGB           | Forward   | TCTATCCCTCCGACAGCCAA    |
|                | Reverse   | CGTCGTTTGTCCACCTCAGA    |
| DHRS9          | Forward   | ACCTCAGAGAGACTTCGTACTG  |
|                | Reverse   | CCGGGAACACCAGCATTATT    |
| ESM1           | Forward   | GGCATCTGGAGATGGCAATA    |
|                | Reverse   | CCATTTCTCATTACGGGAGAC   |
| FNDC1          | Forward   | AGCCCAACACGAGGTATTATTT  |
|                | Reverse   | CCTCACAACAAGCAGAGGATTA  |
| GLS2           | Forward   | TGCCATCGGCTATTATCTCAAG  |
|                | Reverse   | CAGAACACAGCTGGAAGTAGAG  |
| HPGD           | Forward   | TGAAGGCGGCATCATTATCA    |
|                | Reverse   | CTGAGCGTGTGAATCCAATA    |
| IGFL2          | Forward   | CAGAATCTTCGCTCCTGCTTAT  |
|                | Reverse   | GGGTTGTAGATCTGTCTCCAC   |
| KYNU           | Forward   | CTGCTGGTGTTCCTACAAGTAT  |
|                | Reverse   | GGCCAAACCATCCCACTAA     |
| MMP9           | Forward   | GGGCTTAGATCATTCTCAGTG   |
|                | Reverse   | GCCATTCACGTCGTCCTTAT    |
| MT1M           | Forward   | ACGTGCAAAGAGTGCAAATG    |
|                | Reverse   | CAGTTCTCCAACGTCCCTTT    |
| SLC16A10       | Forward   | CAGCGTCTTCACAGACCTATT   |
|                | Reverse   | CAGAGGCTCGATGGAAGTAC    |
| TTN            | Forward   | CTTCCAGATAACCTTCCAGAGTG |
|                | Reverse   | GACGGTTCCAGCCTCATTTA    |
| $\beta$ -actin | Forward   | GGAAATCGTGCCTGACATTAAG  |
|                | Reverse   | AGCTCGTAGCTCTTCTCCA     |

CHGB, chromogranin B; DHRS9, dehydrogenase/reductase 9; ESM1, endothelial cell specific molecule 1; FNDC1, fibronectin type III domain containing 1; GLS2, glutaminase 2; HPGD, 15-hydroxyprostaglandin dehydrogenase; IGFL2, insulin growth factor-like family member 2; KYNU, kynureninase; MMP9, matrix metalloproteinase 9; MT1M, metallothionein 1M; SLC16A10, solute carrier family 16 member 10; TTN, titin.
